# Supplementary material for: Looping Mediated Interaction between the Promoter and 3′ UTR Regulates Type II Collagen Expression in Chondrocytes
Source: PLoS One. 2012 Jul 16;7(7):e40828. doi: 10.1371/journal.pone.0040828 (PMC3397959; doi:10.1371/journal.pone.0040828)
Supplement: Figure S1 — Comparative sequence analysis of the mouse and human Col2a1 loci. Comparison of the genomic sequence of murine and human 3′ UTR region. Positions are assigned with respect to the transcription start site (TSS). Potential binding sites for Lef1 that met the most stringent requirements (matrix similarity values (0.8), using rVISTA 2.0 and TRANSFAC database analysis, are identified and boxed. Primer pair at position +29054 (indicated by bold letter C) and +29243 generate a 189 bp 3′ UTR construct and primer pair at position +29110 (indicated by bold letter A) and +29243 generate a 133 bp 3′ UTR construct. (PDF) [file pone.0040828.s001.pdf]

Figure S1.

**+28700**

mouse CTGACCTGACCTGATGATACCCAACCGTCC--TCCCCTCACAGCCCGGACTGTGCTCCC----CTTTCTAAGAGACCTGAACTGGGCA

**+28783**

mouse GACTGCAAATAAAATCTCGGTGTTCTATTTATTTATTGTCTTCCTGTAAGACCTCTGGGTCCAGGCGGAGACAGG-AACTATCTGGT

**+28870**

mouse GTGAGTCAGACGCCCCCGAGTGACTGTTCCCAGCCCAG-CCAGAAGAC--CCCTACAGATGCTGGGCGCAGGGAC--TGCGTGTCTCT

**+28953**

mouse ACACAATGGTGCTATTCTGTGTCAAACACCTCTGTATTTTTTAAAACATCAATTGATATTA AAAACCAAAAAAAAAAAAAAATCATTGGA  
|||||

human ACACAATGGTGCTATTCTGTGTCAAACACCTCTGTATTTTTTAAACATCAATTGATATTA AAAAT-----GAAAAGATTATTGGA

+29041

**+29054**

**Lef1**

**+29110**

mouse AAGGATATGGTGACTTGTGTTTGTTCTTTGTTTTGTTCTTCCGGTTGTATTTACTAGTCCTTGTTCTATAAGGCATGCCCAAATA-

human AAGTACATATTGACTTGTGGTTTGTCTTTAGTTTGTCTTCC-----ATTAATCCTCCGTTCTGT-AGGCATGCCCAAATAG

**+29128**

mouse TGGTCCC-AGGACT--GTCTGTGGACCTTACAATC-----CAGGATGCTGAAGTCACACTGCCTGGTTTGGTGATGTCACTCACACA  
 ||| | ||||| ||||| || || ||| | |||| ||||| ||||| ||| || || | |||||

human CAGTCCTAAGGACTTCTTCTGTTGATTTTTCAACCGAGAGTAAGGACACTGAAGCCACACCGCCAGGGTTAGCAGC----CTCACACA

+29207

+29243

mouse CACAAAAGACCTGCCTCTCTTGTAACCTTGGGCACTT

human AACATGA-ACTTGCCTCTCTGGTAAACCTTGGCACTA
