# Supplementary material for: Looping Mediated Interaction between the Promoter and 3′ UTR Regulates Type II Collagen Expression in Chondrocytes
Source: PubMed Central journal article supplement (PMC3397959; doi:10.1371/journal.pone.0040828), 2012-07-16

Figure S2.

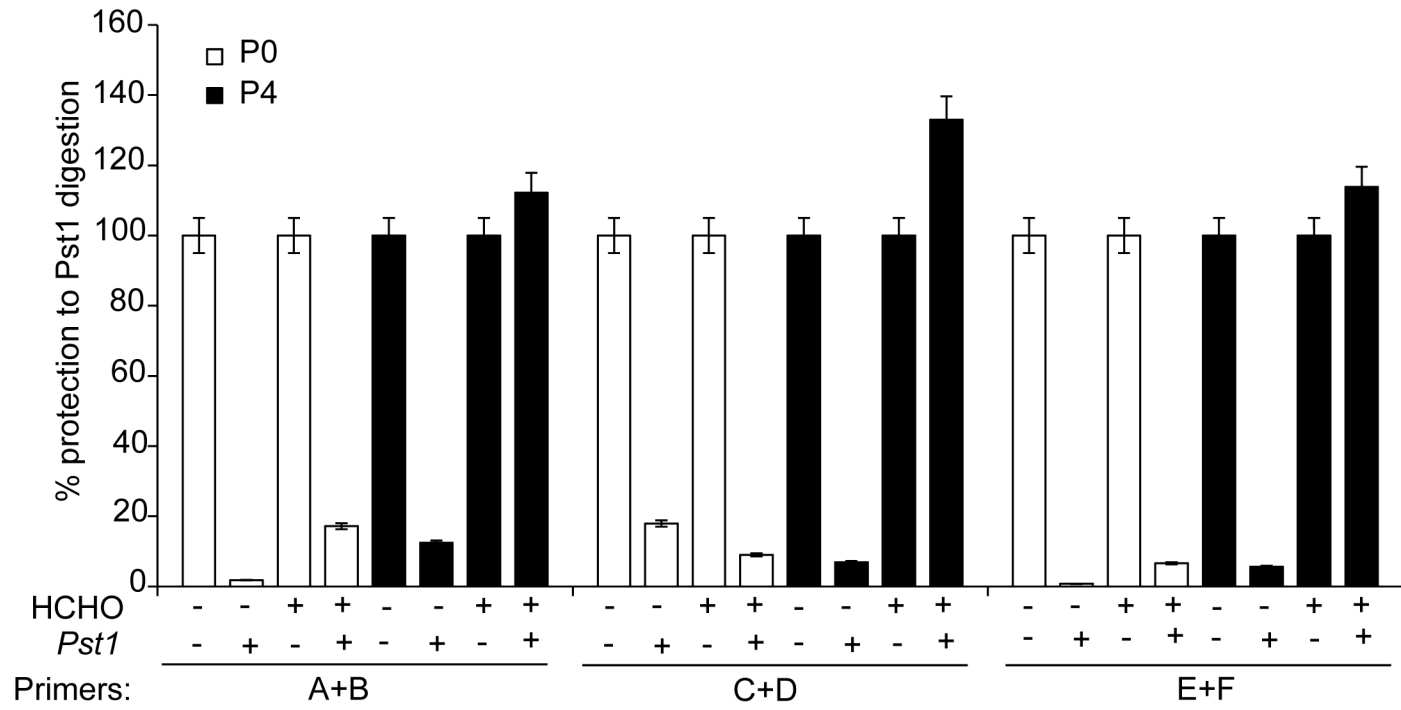

Supplement: pone.0040828.s002.pdf [file pone.0040828.s002.pdf]
